# Supplementary material
Source: PubMed Central journal article supplement (PMC3422479)
Supplement: cdd201246x1.pdf [file cdd201246x1.pdf]

## Supplemental Figure 1

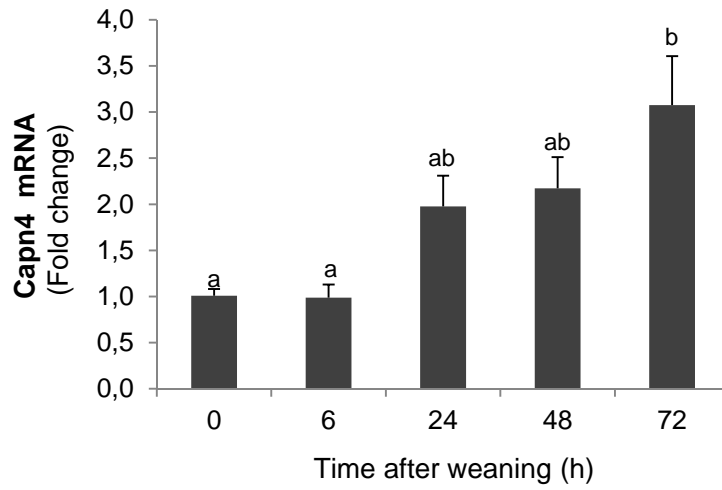

**Figure S1:** Capn4 mRNA expression in mice mammary tissue at the peak of lactation (0h) and at different times after weaning (6, 24, 48 and 72h) measured by real-time RT-qPCR.
