# Supplementary material
Source: PubMed Central journal article supplement (PMC3422479)
Supplement: cdd201246x2.pdf [file cdd201246x2.pdf]

## Supplemental Figure 2

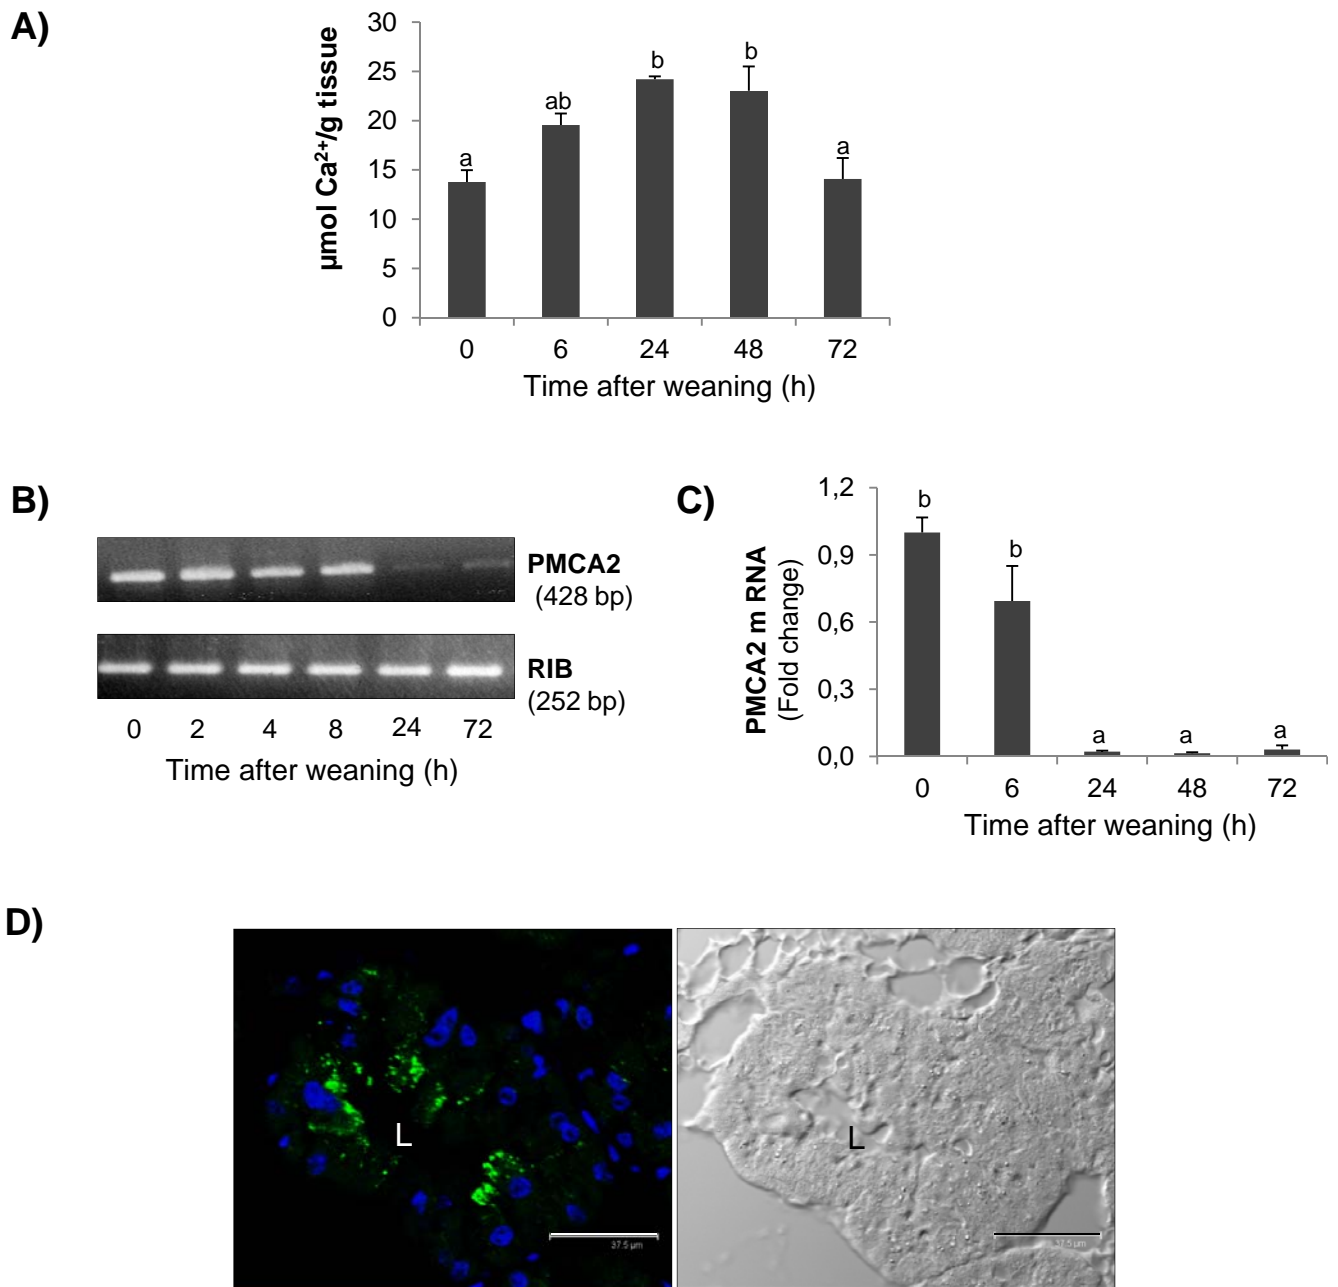

**Figure S2:** **A)** Mice mammary gland calcium content during involution. **B)** Semi-quantitative PCR was performed on *PMCA2* gene, in involution time points from rat samples. The primers used for RT-PCR were: *PMCA2* forward: 5'-TCTGGTGAGGGTGTACTGAGGACA-3' and reverse: 5'-GAGCGTCACGTCCTGTAGTGC-3'. *18SRIB* forward: 5'-ATTCGCTGCACGAACTGCG-3' and reverse: 5'-CAGCAGGTCTGAATCGTGGT-3'. **C)** *PMCA2* mRNA expression in mice at the peak of lactation (0h) and at different times after weaning (6, 24, 48 and 72h) measured by real-time RT-qPCR. **D)** Immunohistochemical analysis of CAPN1 in mice at the peak of lactation. CAPN1 locates at the apical cells of the acini, where calcium might be initially accumulated during weaning. Scale bars, 37,5 µm. L: Lumen
