# Supplementary material
Source: PubMed Central journal article supplement (PMC3422479)
Supplement: cdd201246x3.pdf [file cdd201246x3.pdf]

## Supplemental Figure 3

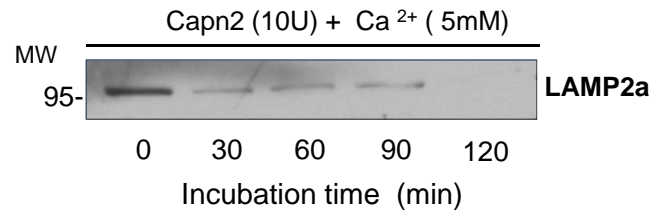

**Figure S3:** Western blot showing LAMP2a protein levels. Lysosomal extracts from control lactating mice were incubated with recombinant calpain-2 at different incubation times (30, 60, 90 and 120 min at 37°C)
