# Supplementary material
Source: PubMed Central journal article supplement (PMC3422479)
Supplement: cdd201246x4.pdf [file cdd201246x4.pdf]

## Supplemental Table 1

| GenBank accession number | Gene symbol | gene synonym | Description                                                        | Fold change 48h. weaned vs control |
|--------------------------|-------------|--------------|--------------------------------------------------------------------|------------------------------------|
| NM_175025                | Atp2c1      | SPCA         | ATPase, Ca <sup>2+</sup> -sequestering                             | -2,08043                           |
| NM_026922                | Atp2c2      | SPCA2        | ATPase, Ca <sup>2+</sup> transporting, type 2C, member 2           | -1,46928                           |
| NM_001110140             | Atp2a2      | SERCA2B      | ATPase, Ca <sup>2+</sup> transporting, cardiac muscle, slow twitch | 1,8931                             |

**Supplementary Table 1:** mRNA levels of different calcium pumps in mice at the peak of lactation and at 48h after weaning.
